# Supplementary material for: A validated analytical method to measure metals dissolved in deep eutectic solvents
Source: Royal Society of Chemistry journal article supplement (doi:10.1039/d3ra02372a), 2023-01-01
Supplement: d3ra02372a1.pdf [file d3ra02372a1.pdf]

1 **Supplementary Information**

2

3

4

5

6

7

8

9 **A validated analytical method to measure metals dissolved in deep**  
10 **eutectic solvents**

11

12 Halimeh Askari Sabzkoohi, Vicky Dodier, Georgios Kolliopoulos\*

13

14

15

16 *Department of Mining, Metallurgical, and Materials Engineering,*  
17 *Université Laval, 1065 Av. de la Médecine, Québec, Québec, Canada G1V 0A6*

18

19

20

21 *\*Corresponding authors' email: [georgios.kolliopoulos@gmn.ulaval.ca](mailto:georgios.kolliopoulos@gmn.ulaval.ca)*

22

23

24

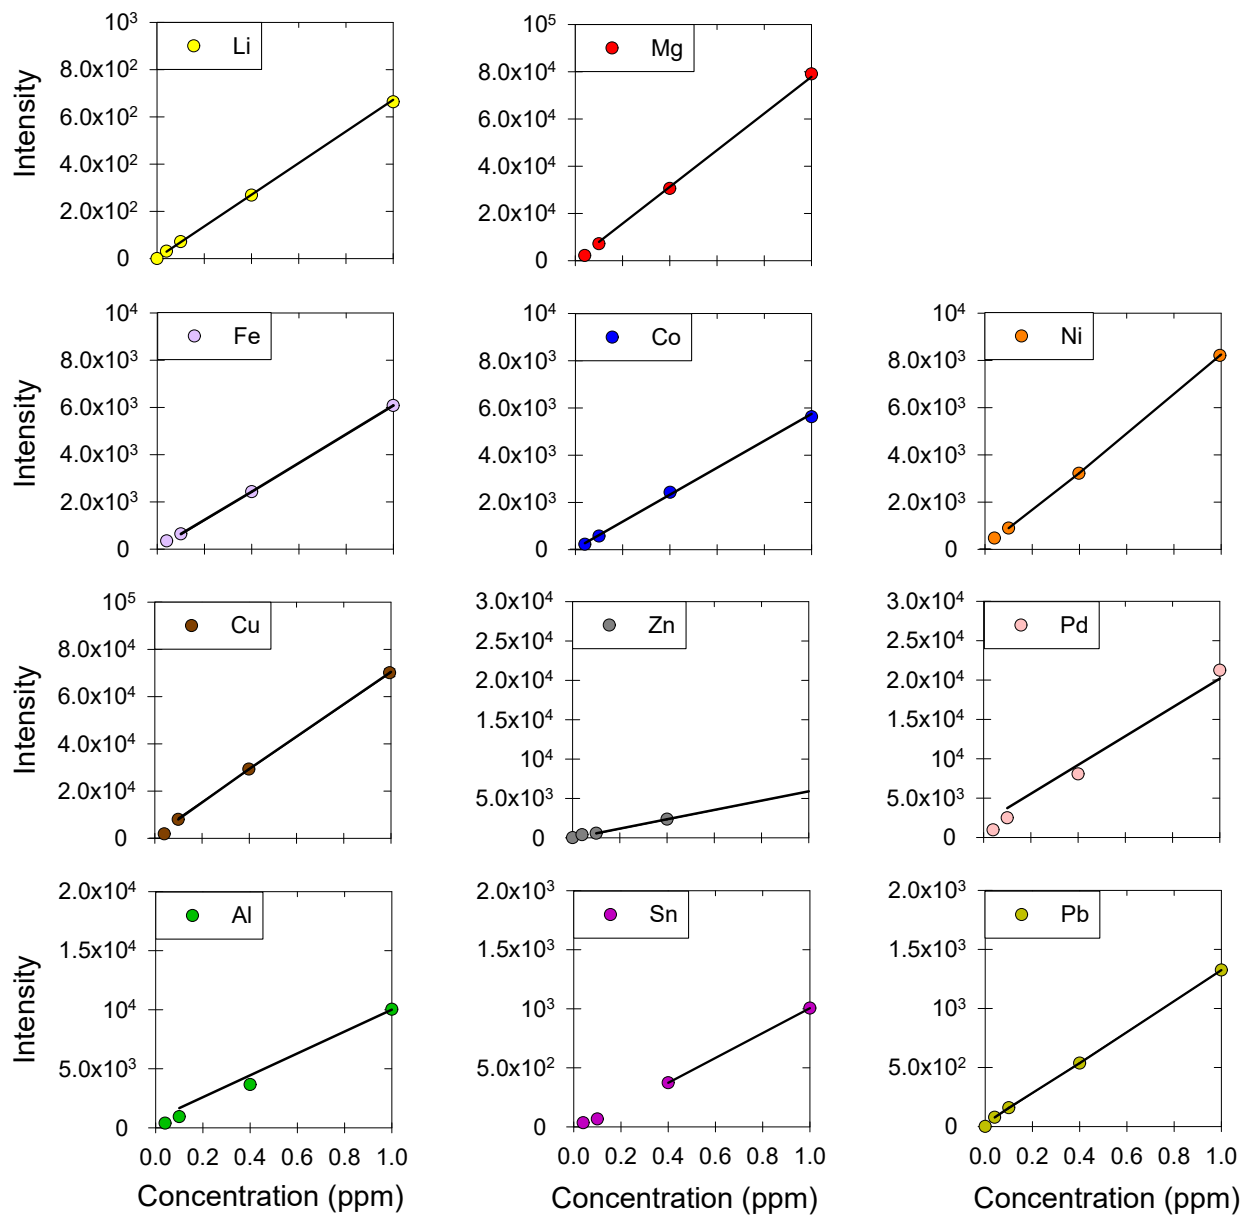

25

26

27 **Figure S1:** Calibration curve data at the 0.01, 0.04, 0.1, 0.4, 1  $\mu\text{g/mL}$  concentration levels, which  
 28 were contracted in Figure 2, for Li, Mg, Fe, Co, Ni, Cu, Zn, Pd, Al, Sn, and Pb in  $\text{ChCl:EG:I}_2$ . The  
 29 markers represent the data points corresponding to the intensity-concentration values of each  
 30 sample. The black straight line represents the linear part of each calibration curve, as obtained  
 31 from the linear regression equations,  $R^2$  values, and the F-test results.

32

33

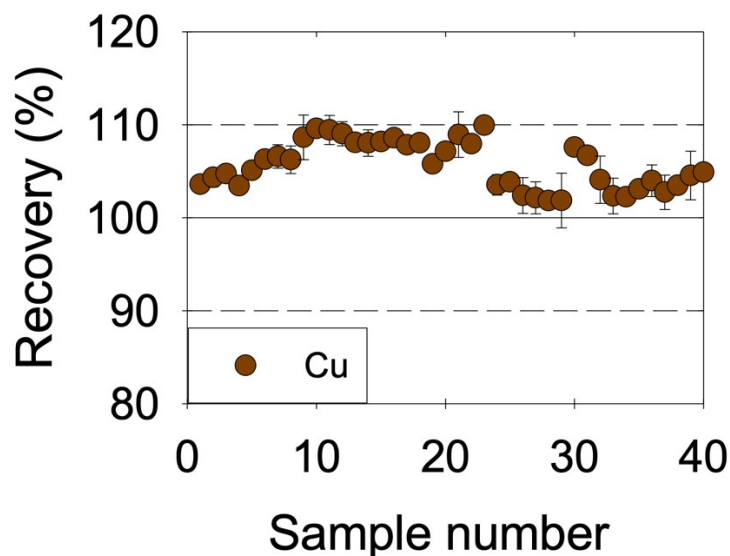

34

35 **Figure S2:** Inter-run precision of the analytical method developed for the determination of Cu in  
 36  $\text{ChCl}:\text{EG}:\text{I}_2$ . Measurements of 40 samples of  $2 \mu\text{g}/\text{mL}$  were obtained at different days in a 2-month  
 37 period and the accuracy (as % recovery) of the analytical method for each element was estimated.  
 38 The acceptability criterion for the recovery was within 90–110%.

39

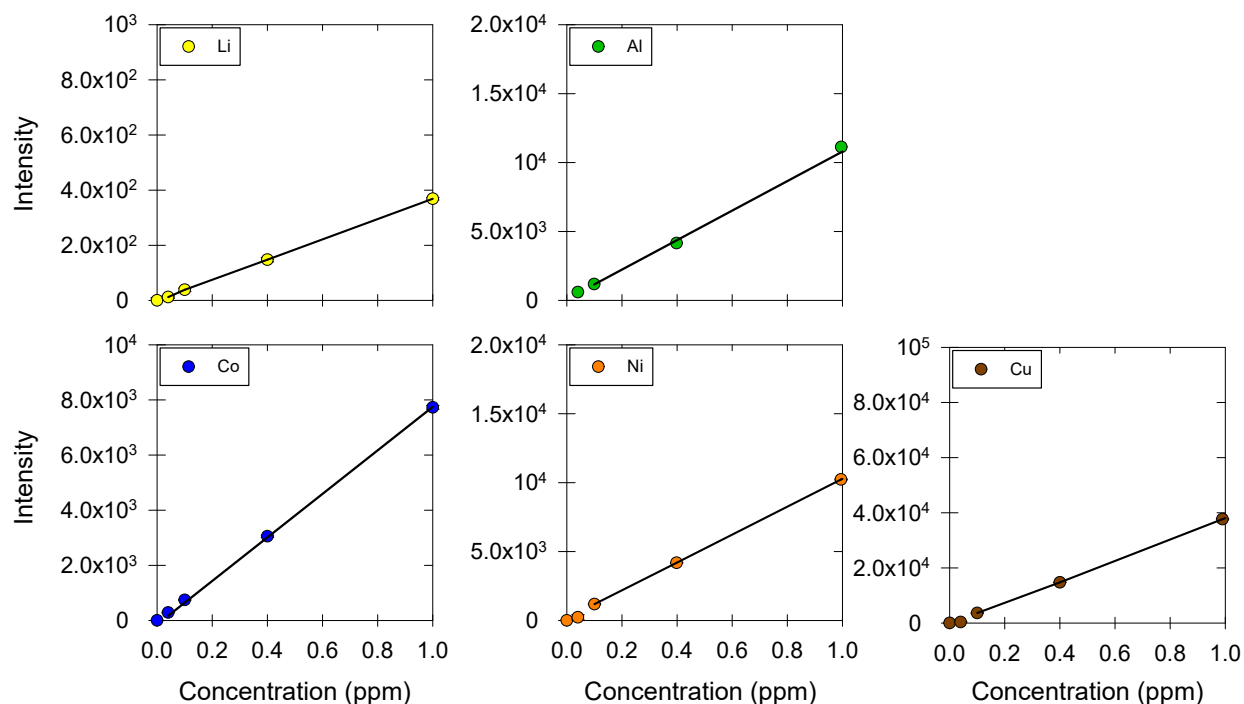

40

41 **Figure S3:** Calibration curve data at the 0.01, 0.04, 0.1, 0.4,  $1 \mu\text{g}/\text{mL}$  concentration levels, which  
 42 were contracted in Figure 5, for Li, Co, Ni, Cu, and Al in  $\text{ChCl}:\text{EG}$ . The markers represent the data  
 43 points corresponding to the intensity-concentration values of each sample. The black straight line  
 44 represents the linear part of each calibration curve, as obtained from the linear regression  
 45 equations,  $R^2$  values, and the F-test results.

46

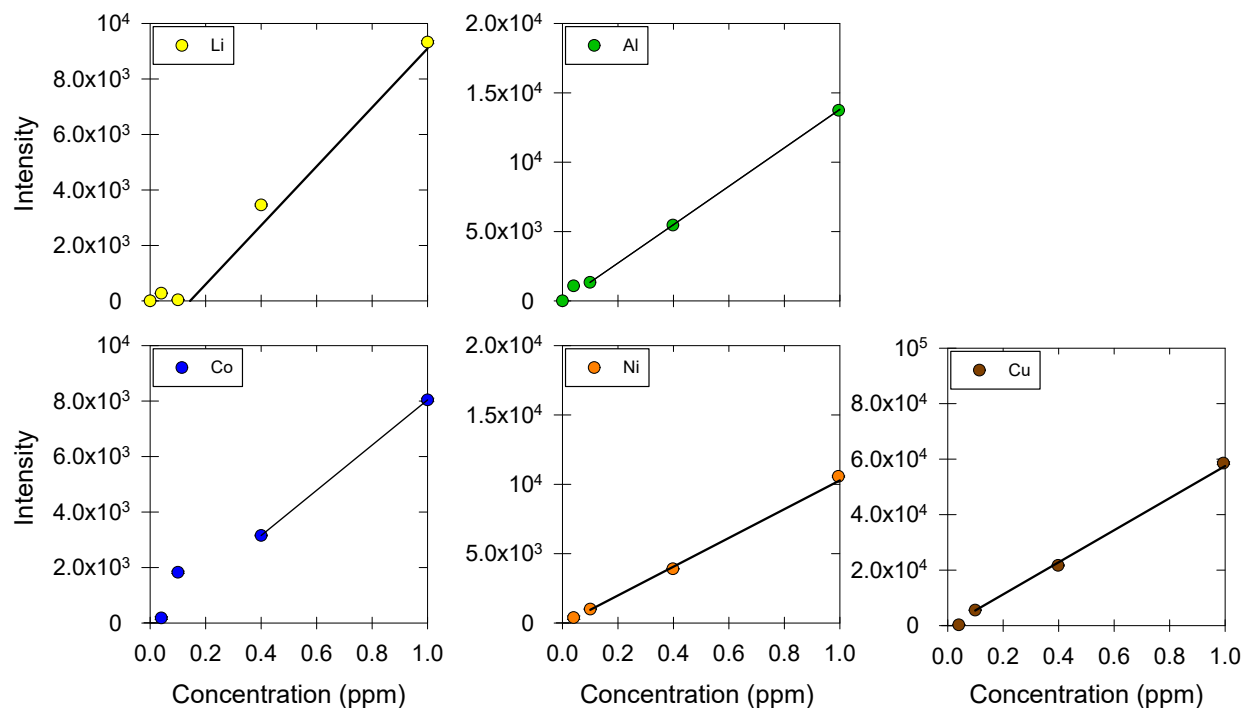

47  
48

49 **Figure S4:** Calibration curve data at the 0.01, 0.04, 0.1, 0.4, 1  $\mu\text{g}/\text{mL}$  concentration levels, which  
50 were contracted in Figure 6, for Li, Co, Ni, Cu, and Al in ChCl:LA. The markers represent the data  
51 points corresponding to the intensity-concentration values of each sample. The black straight line  
52 represents the linear part of each calibration curve, as obtained from the linear regression  
53 equations,  $R^2$  values, and the F-test results.
